# Supplementary material
Source: PubMed Central journal article supplement (PMC2715810)
Supplement: supp_29_15_4295__2.pdf [file supp_29_15_4295__2.pdf]

## 1    **SUPPLEMENTAL FIGURE LEGENDS**

2    Supplemental FIG. S1. RNase Protection Assay. (A) Cartoon of probe design for  
3    RNase protection assay (RPA) against murine *Xbp1* mRNA, pre-rRNA, and *7SL*  
4    (not to scale). The *Xbp1* probe contains sequences complimentary to nucleotides  
5    207-505 of the *Xbp1* coding region. The *Xbp1* probe yields two distinct protected  
6    fragments (thin gray lines) corresponding to unspliced and spliced forms *Xbp1*.  
7    The pre-rRNA probe is complimentary to nucleotides 537-767 of the of the rRNA  
8    primary transcript yielding a protected fragment of 232 nt. If cleavage at site +650  
9    has occurred, the protected fragments are half the size and migrate much faster  
10    on the polyacrylamide gel. *7SL* probe is complimentary to nucleotides 59-227 of  
11    the *7SL* RNA. All probes contain 16-18 nt of non-complementary sequence at the  
12    5' end of the probe (black lines) in order to distinguish full length probe from full  
13    length protected fragments. (B) Autoradiograph of a representative RPA showing  
14    a single exposure of all three probes on the top panel, and lower panels show  
15    optimal exposures of *Xbp1* and *7SL* used in Figures 1-4; Figure 6; and  
16    supplemental Figures S2, S4, and S5. Lanes 1 and 2 are yeast tRNA control  
17    RNase protection reactions with (lane 2) or without (lane 1) addition of RNase.  
18    Lanes 3-8 are RNase protection reactions from the indicated concentration of  
19    wild type MEF RNA isolated from cells with (lanes 6-8) or without (lanes 3-5)  
20    treatment of 200 nM Tg for 2 hr. RNA was hybridized to all three probes  
21    overnight and the entire reaction was loaded onto a 6% denaturing acrylamide  
22    gel except 1/25<sup>th</sup> of the reaction was loaded in lane 1 to show undigested probes.  
23    Note the lack of protected fragments in lane 2 indicating probes do not hybridize

1 to one another, and in lanes 3-8 small protected fragments resulting from cleaved  
2 products are not shown.

3  
4 Supplemental FIG. S2. Comparison of pre-rRNA analyzed by Northern or RPA.  
5 (A) Northern blot from wild type MEFs treated with Tg (200 nM) over a 12 hr time  
6 course. 10 µg of total RNA was run on 1% formaldehyde northern gel, transferred  
7 to zeta-probe membrane, and probed for full length pre-rRNA and RPA194  
8 mRNA as loading control. (B) RPA probing for pre-rRNA and 7SL using 2.5µg of  
9 the same RNA samples as in (A).

10  
11 Supplemental FIG. S3. Nuclear Run On of Pol II and Pol III Transcripts. (A)  
12 Nuclear Run On analysis of Pol II transcripts *BiP*, inducible heat shock protein 70  
13 (*Hsp70*), β-actin (*Actb*), α-tubulin (*Tuba2*), triosephosphate isomerase 1 (*Tpi1*),  
14 histone H1 (*H1.0*), and hexokinase II (*HKII*) as well as Pol III transcripts *7SK* and  
15 *7SL*. (B) Quantitation of nuclear run on as showed in (A). Each bar represents  
16 the mean and SD of three independent experiments.

17  
18 Supplemental FIG. S4. (A) Western blots from *Perk*<sup>+/+</sup> and *Perk*<sup>-/-</sup> MEFs treated  
19 with Tg (200 nM) or DMSO (NT, 0.1%) over a 12 hr time course. Protein samples  
20 were run on denaturing polyacrylamide gels and probed with antibodies against  
21 phospho-eIF2α (top). Blots were stripped and then re-probed with antibodies  
22 against total eIF2α. (B) *eIF2a*<sup>ΔA</sup> MEFs completely fail to downregulate pre-rRNA  
23 during 12 hrs of ER stress. RPA probing for pre-rRNA, *Xbp1*, and *7SL* in total

1 RNA isolated from *eIF2α<sup>S/S</sup>* and *eIF2α<sup>A/A</sup>* MEFs treated with Tg (200 nM) or  
2 DMSO (NT, 0.1%) over a 12 hr time course. (C) *eIF2α<sup>S/S</sup>* and *eIF2α<sup>A/A</sup>* MEFs  
3 were treated with Rap (20 nM). Total RNA was analyzed by RPA against pre-  
4 rRNA (top), and 7SL (bottom).

5

6 Supplemental FIG. S5. PERK Regulation of rRNA is Specific to UPR. (A)  
7 Quantitation of rRNA promoter DNA amplified from ChIP samples using antibody  
8 against UBF. *Perk<sup>+/+</sup>* (black bars) and *Perk<sup>-/-</sup>* MEFs (white bars) were either  
9 untreated (NT) or treated with Tg (200nM) or H<sub>2</sub>O<sub>2</sub> (30 μM) for 1 hr. Control ChIP  
10 was performed with samples from wild type MEFs using antibodies against  
11 GAPDH. Each bar represents the mean and SD of three independent  
12 experiments. Promoter DNA amplified from untreated cells were given the value  
13 of 1. (B) Ethidium staining of the first internal transcribed spacer (ITS-1) DNA  
14 amplified from ChIP samples using antibody against GAPDH, RRN3/TIF-IA, and  
15 Pol I (RPA194) upon treatment with Tg (200 nM). PCR was performed using two  
16 dilutions of ChIP template DNA for each sample representing a three-fold dilution  
17 of template DNA. Note that GAPDH and RRN3/TIF-IA ChIP do not pull down  
18 significant quantities of ITS-1 DNA. (C) Time course of *Perk<sup>+/+</sup>* and *Perk<sup>-/-</sup>* MEFs  
19 treated with ANS (10 μM). Cellular RNA was isolated at the indicated times and  
20 analyzed by RPA using probes against pre-rRNA, and 7SL. (D) Quantitation of  
21 pre-rRNA relative to 7SL during ANS treatment in *Perk<sup>+/+</sup>* (solid line) and *Perk<sup>-/-</sup>*  
22 cells (dashed line) as shown in (A). Each transcript at 0 hr was given the value of  
23 1, and each point represents the mean ± SD of a minimum of three independent

1 experiments. (E) and (F) Quantitation of rRNA promoter DNA amplified from  
2 ChIP samples using antibody against Pol I (RPA194; C) or RRN3/TIF-IA (D) from  
3 *Perk*<sup>+/+</sup> (dark grey) and *Perk*<sup>-/-</sup> MEFs (light grey) treated with H<sub>2</sub>O<sub>2</sub> (30 μM) for the  
4 indicated times. Control ChIP was performed with samples from wild type MEFs  
5 using antibodies against GAPDH. Each bar represents the mean and SD of three  
6 independent experiments. Promoter DNA amplified from untreated cells was  
7 given the value of 1.

8

9 Supplemental FIG. S6. Analysis of Purified RRN3/TIF-IA and UBF. (A) Western  
10 blot of indicated concentrations of purified FLAG-RRN3 protein (lanes 2-3) and  
11 25μg of untreated nuclear extracts used for in vitro transcription (Ex; lane 1).  
12 Blots were probed with antibodies against RPA194 (Pol I), UBF, and FLAG  
13 (Sigma). Note the UBF antibody recognizes both isoforms of UBF protein, and  
14 that both UBF and Pol I are not detected in the FLAG-RRN3 purification (B)  
15 Coomassie stained gel of purified FLAG-RRN3 protein. Molecular weights of  
16 protein marker is indicated in KDa. (C) Western blot of partially purified UBF  
17 protein isolated from Novicoff hepatoma cells and 25μg of untreated nuclear  
18 extracts used for in vitro transcription (Ex). The amount of UBF protein used in  
19 transcription reactions in Figure 6D were estimated to be 2.5 and 5 fold the level  
20 of the endogenous UBF in the nuclear extract. Note the UBF antibody recognizes  
21 both isoforms of UBF protein.
