# Supplementary material
Source: PubMed Central journal article supplement (PMC2715810)

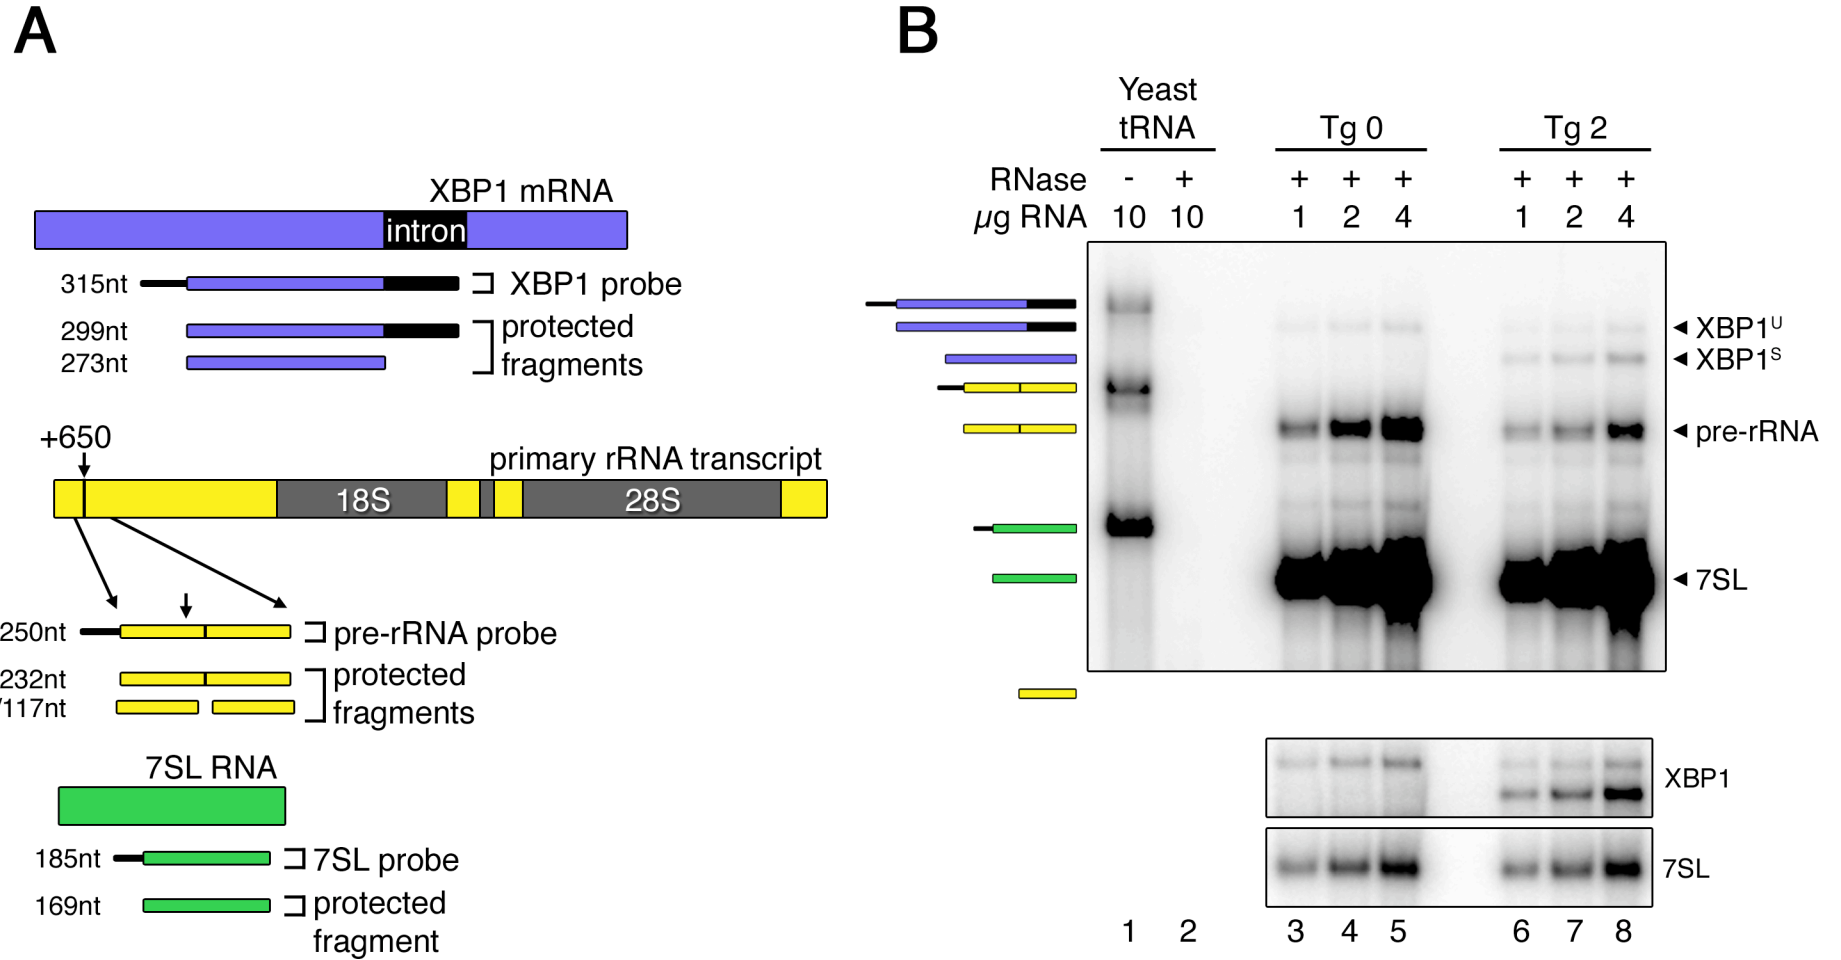

**A**

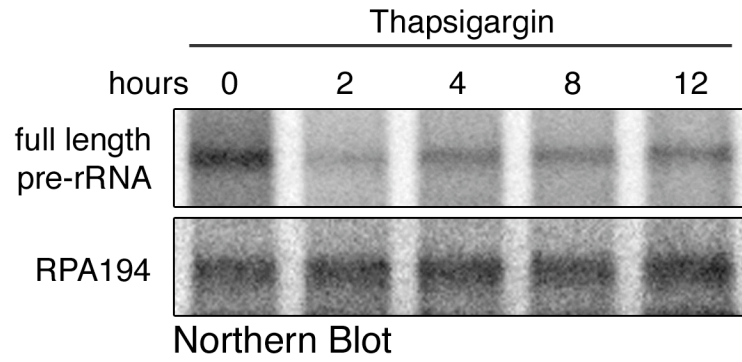

**B**

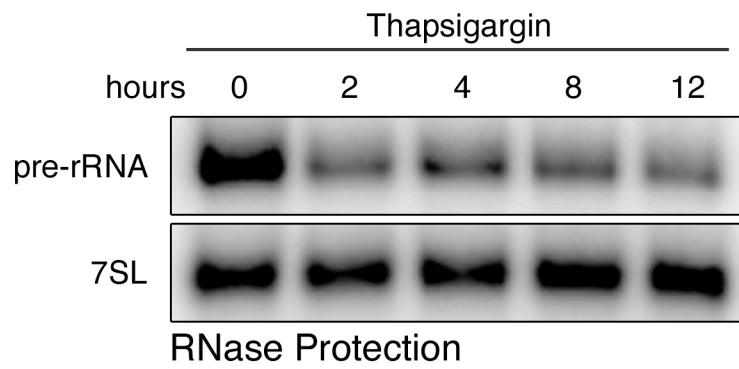

**A**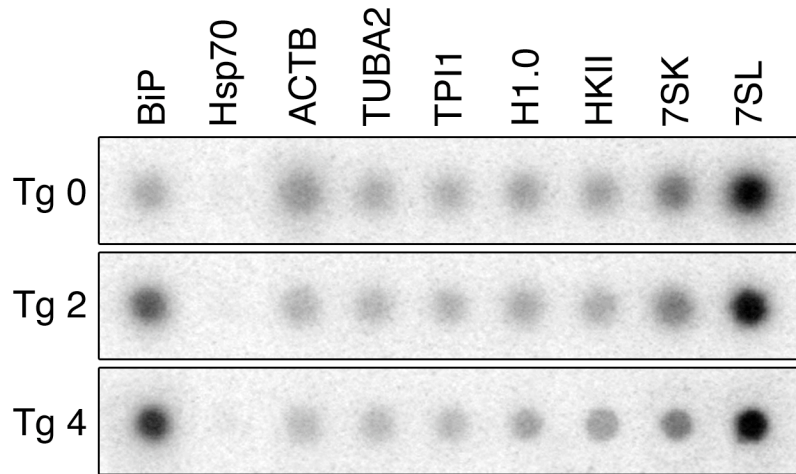**B**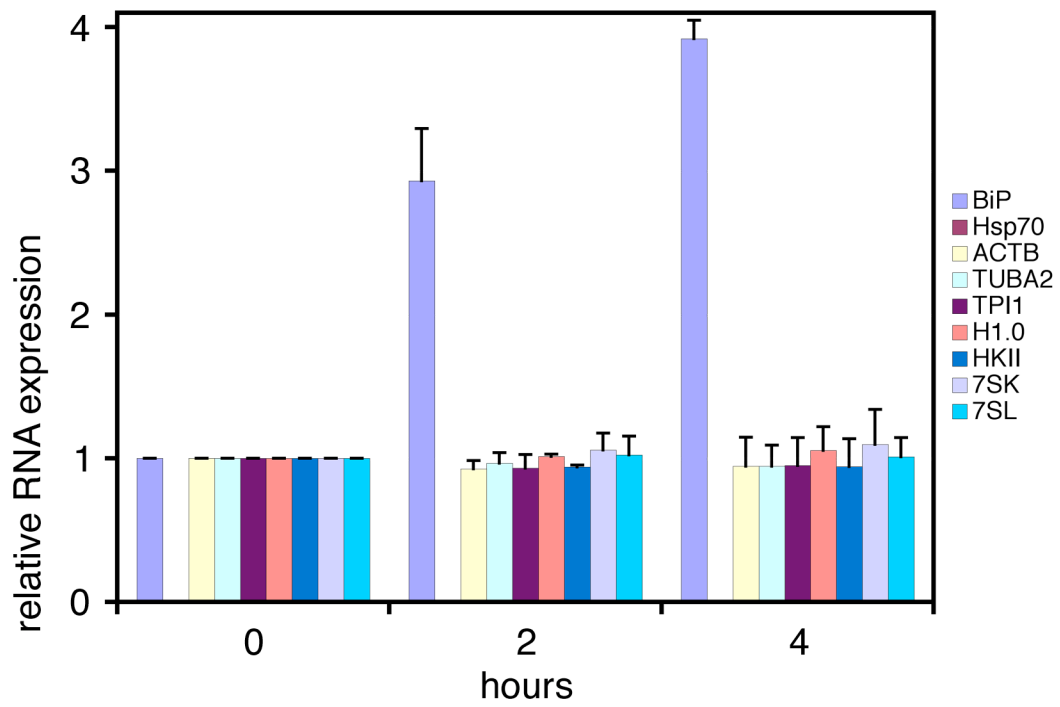

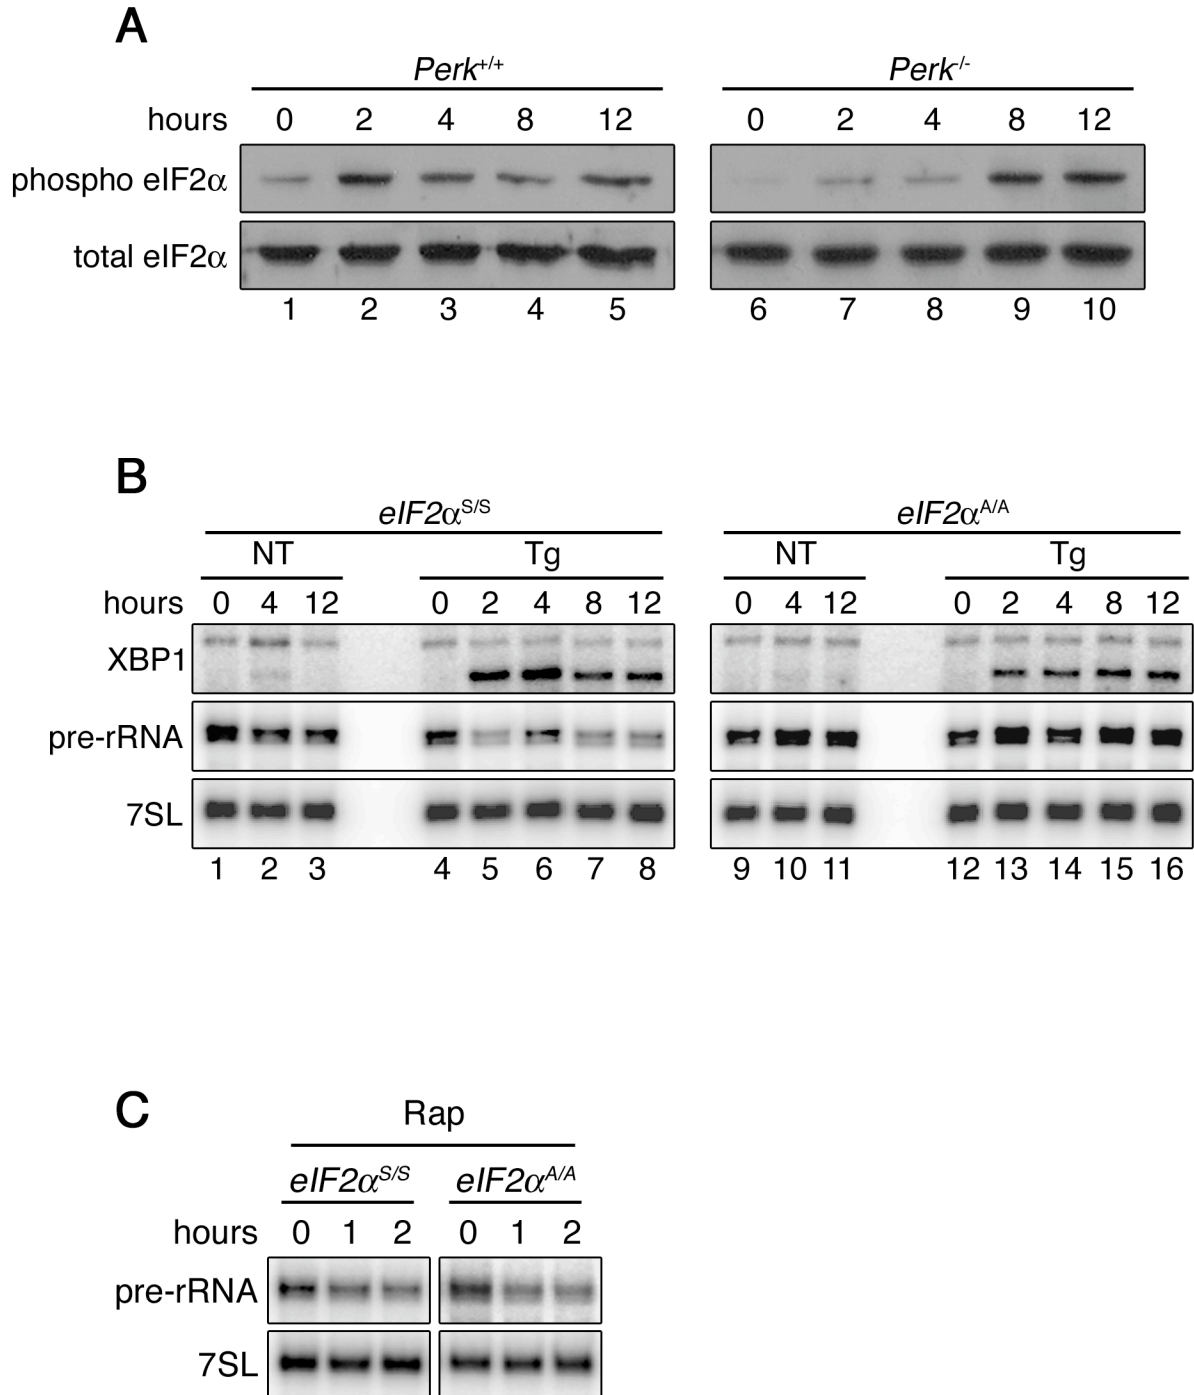

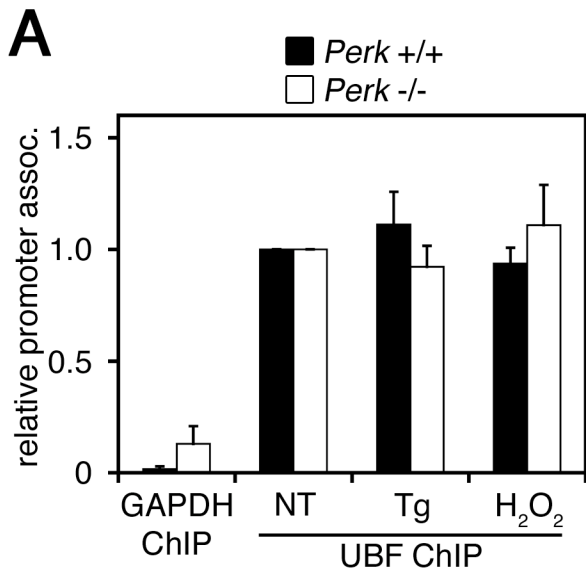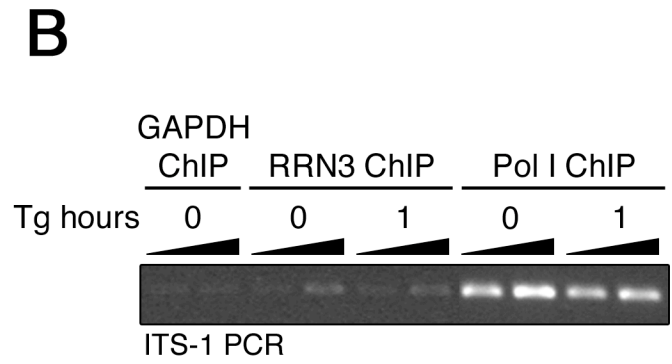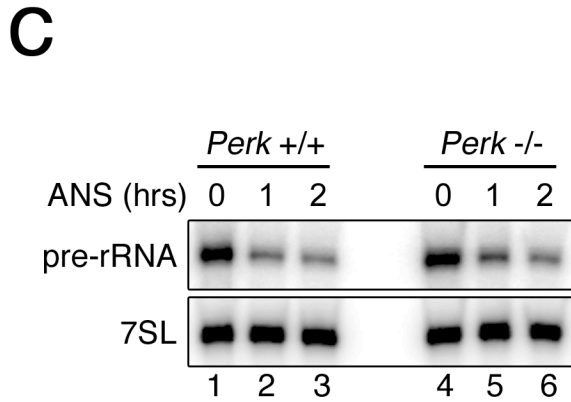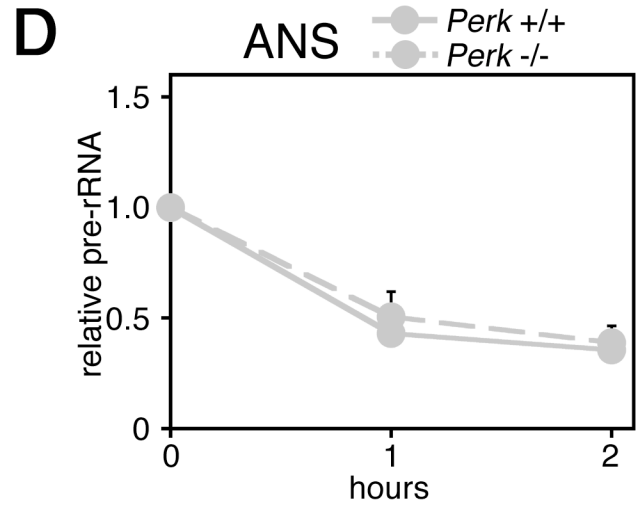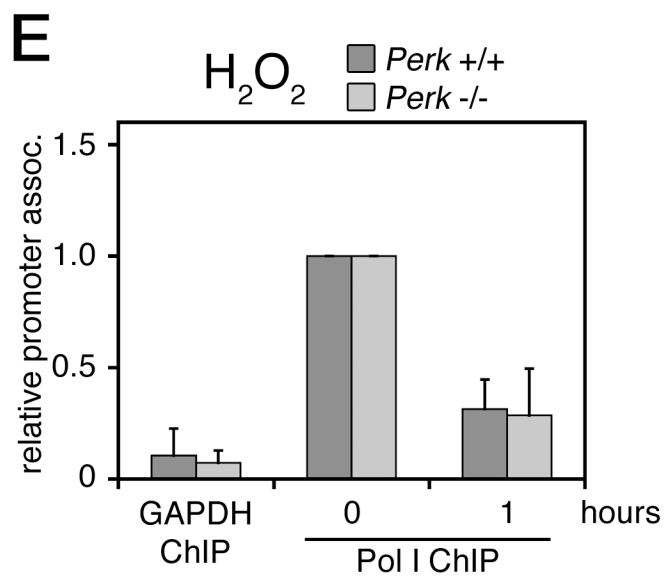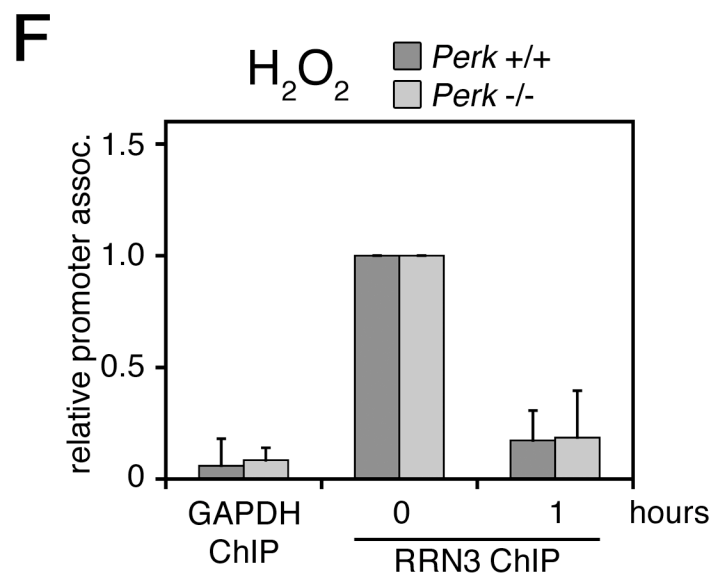

**A**

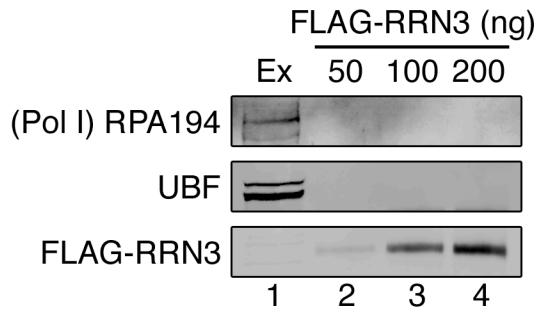

**B**

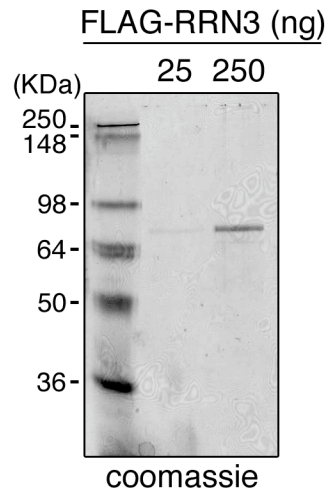

**C**

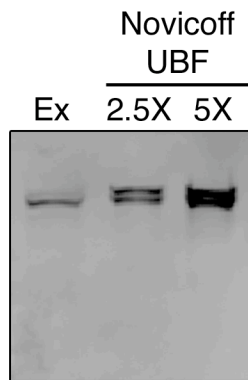

Supplement: supp_29_15_4295__1.pdf [file supp_29_15_4295__1.pdf]
